# Supplementary material
Source: PubMed Central journal article supplement (PMC3528561)
Supplement: 1218887109_pnas.201218887SI.pdf [file 1218887109_pnas.201218887SI.pdf]

# Supporting Information

Cambronne et al. 10.1073/pnas.1218887109

## SI Materials and Methods

**miRNA Mimics.** Based on mature sequences (hsa-miR-132-3p; hsa-miR-124-3p; hsa-miR-181d-5p; miR-Scrm: AUGUGGUCCA-ACCGACUAAUACAG), dsRNA oligo mimics consisted of 5' phosphates, 2-nt overhangs at each 3' end, and a single base pair mismatch at nt 4 from the 3' end of the passenger strand (1). Cel-miR-239b dsRNA oligo mimic was purchased from Dharmacon.

**qPCR.** A total of 100 ng RNA was used for generation of first-stand cDNA using oligo-dT ( $T_{15}$ - $T_{20}$ ) following standard SuperScript III manufacturer protocol (Invitrogen). Samples were then diluted 1:15 with water and 2  $\mu$ L of diluted cDNA was used in triplicate for qPCR with SYBR Supermix (Bio-Rad) and gene-specific primers.

**Cell Culture, Transfections, and Antibodies.** HEK293T cells were grown in DMEM media supplemented with 10% (vol/vol) FBS. Either Lipofectamine 2000 or calcium phosphate was used to transfect expression vectors for Flag-dnGW182, dual luciferase constructs in pSI-Check2 (Promega), CMV-Flag-PTBP1, and/or microRNA oligo mimics. Primary antibodies used for Western blotting include anti-Flag M2 (Sigma), anti-Ago1 4B8 (Sigma), anti-Ago2 (Abcam; ab57113), anti-GAPDH (Millipore; MAB374), CRK C-18 (SCBT), anti-HbEGF (Abcam; ab16783), anti-TJAP1 (Abcam; ab80444), anti-DHHC9 (Abcam; ab74504), and anti- $\alpha$ -tubulin DM1A (Sigma).

**Definition of MREs.** Motifs were defined following Baek et al. (2) and Chi et al. (3).

1. Schwarz DS, et al. (2003) Asymmetry in the assembly of the RNAi enzyme complex. *Cell* 115(2):199-208.
2. Baek D, et al. (2008) The impact of microRNAs on protein output. *Nature* 455(7209): 64-71.

3. Chi SW, Hannon GJ, Darnell RB (2012) An alternative mode of microRNA target recognition. *Nat Struct Mol Biol* 19(3):321-327.

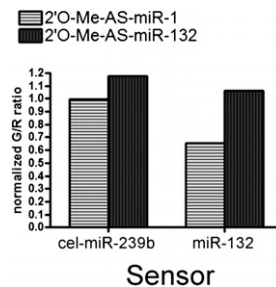

**Fig. S1.** Detection of endogenous miR-132 activity in HEK293T cells. Bidirectional two-color sensors (1) for miR-132 and control cel-miR-239b were used to monitor endogenous miR-132 activity in HEK293T cells (gray). The response for endogenous miR-132 was confirmed by transfection of 50  $\mu$ M of 2'OMe miR-132 antisense inhibitor.

1. Magill ST, et al. (2010) microRNA-132 regulates dendritic growth and arborization of newborn neurons in the adult hippocampus. *Proc Natl Acad Sci USA* 107(47):20382-20387.

| sample | date      | sequencing lane | condition | total reads | uniquely mapped reads | % mapped |
|--------|-----------|-----------------|-----------|-------------|-----------------------|----------|
| 4      | 9/30/2011 | 1               | miR-132   | 49238950    | 38751139              | 78.7%    |
| 8      | 9/16/2011 | 2               | miR-132   | 47874130    | 36232555              | 75.7%    |
| 12     | 9/25/2011 | 3               | miR-132   | 59463409    | 31767959              | 53.4%    |
| 3      | 9/30/2011 | 1               | miR-124   | 28298431    | 22870389              | 80.8%    |
| 7      | 9/16/2011 | 2               | miR-124   | 37706512    | 28860734              | 76.5%    |
| 11     | 9/25/2011 | 3               | miR-124   | 30225288    | 22920129              | 75.8%    |
| 2      | 10/7/2011 | 1               | miR-181d  | 48720171    | 30990325              | 63.6%    |
| 6      | 9/16/2011 | 2               | miR-181d  | 36589447    | 28120433              | 76.9%    |
| 10     | 10/7/2011 | 3               | miR-181d  | 37560483    | 28389637              | 75.6%    |

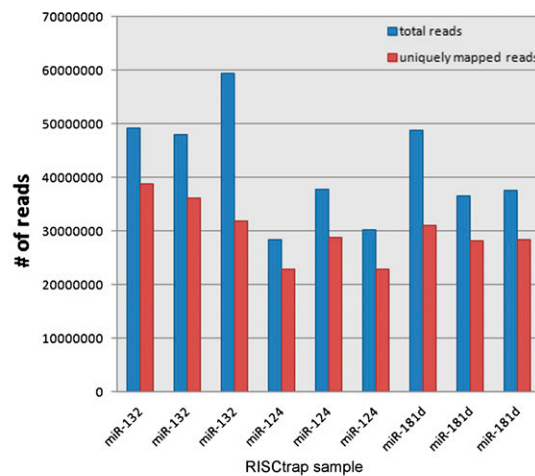

| Biological replicate        |  | 1          | 2          | 3          |
|-----------------------------|--|------------|------------|------------|
| Samples                     |  | miR132_4   | miR132_8   | miR132_12  |
| Total uniquely mapped reads |  | 38,478,115 | 35,804,620 | 36,479,358 |
| Reads in exons              |  | 33,061,256 | 33,065,147 | 33,549,896 |
| % of total                  |  | 85.9%      | 92.3%      | 92.0%      |
| Reads in introns            |  | 3,577,655  | 1,469,670  | 1,612,167  |
| % of total                  |  | 9.3%       | 4.1%       | 4.4%       |
| Reads in intergenic regions |  | 1,839,204  | 1,269,803  | 1,317,295  |
| % of total                  |  | 4.8%       | 3.5%       | 3.6%       |

  

| Samples                     | miR124_3   | miR124_7   | miR124_11  |
|-----------------------------|------------|------------|------------|
| Total uniquely mapped reads | 22,664,502 | 28,530,994 | 22,538,531 |
| Reads in exons              | 20,202,066 | 26,312,784 | 19,362,634 |
| % of total                  | 89.1%      | 92.2%      | 85.9%      |
| Reads in introns            | 1,437,218  | 1,174,842  | 2,155,946  |
| % of total                  | 6.3%       | 4.1%       | 9.6%       |
| Reads in intergenic regions | 1,025,218  | 1,043,368  | 1,019,951  |
| % of total                  | 4.5%       | 3.7%       | 4.5%       |

  

| Samples                     | miR181d_2  | miR181d_6  | miR181d_10 |
|-----------------------------|------------|------------|------------|
| Total uniquely mapped reads | 36,658,080 | 27,768,337 | 27,977,108 |
| Reads in exons              | 33,686,188 | 25,354,161 | 25,835,534 |
| % of total                  | 91.9%      | 91.3%      | 92.3%      |
| Reads in introns            | 1,551,797  | 1,406,986  | 1,131,829  |
| % of total                  | 4.2%       | 5.1%       | 4.0%       |
| Reads in intergenic regions | 1,420,095  | 1,007,190  | 1,009,745  |
| % of total                  | 3.9%       | 3.6%       | 3.6%       |

Fig. S2. Percentage of uniquely mapped reads for each RISCtrap sample and their distribution among exonic, intronic, and intergenic regions. On average, 40–50 million 100-bp single reads were obtained per RISCtrap sample and ~75% were uniquely mapped using Top Hat, a human GRCh37/hg19 reference genome, and RefSeq gene annotation guidance (as of Oct. 9, 2011). The distribution of these uniquely mapped reads among exonic, intronic, and intergenic regions is shown at the *Bottom*.

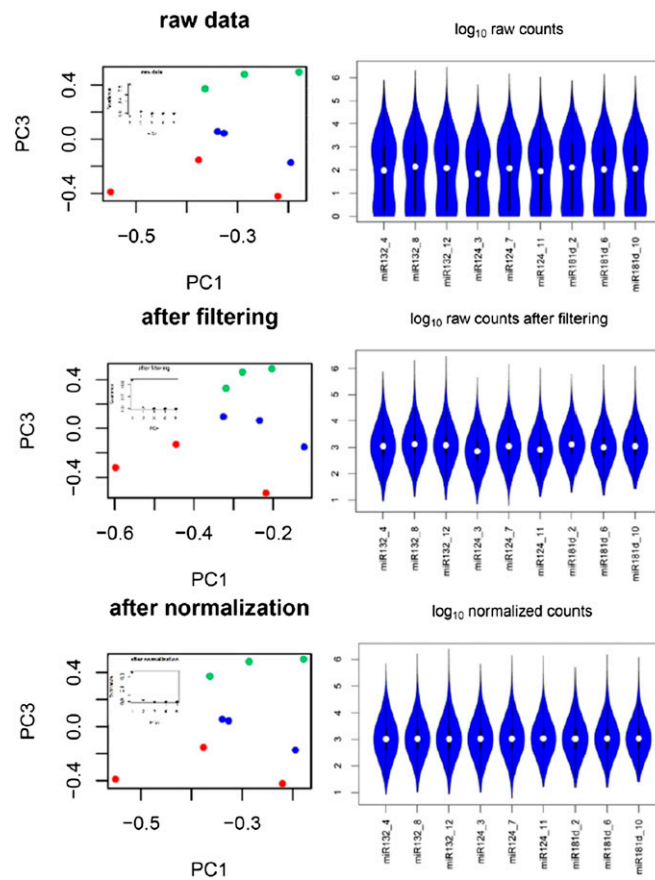

**Fig. S3.** Baseline minimum cutoff, normalization, and PCA of RISctrap samples. To reduce the data dimensionality, we used principal components analysis (PCA) to transform a set of correlated variables into a smaller set of uncorrelated variables. PCA is useful for identifying patterns in the data and clustering datasets with similar conditions. The first component (PC1) describes the largest contribution to variability in the original data, whereas the second component (PC2) describes the next largest contribution to variability, etc. Read counts were assigned to each gene according to the RefSeq annotation. Non-polyadenylated genes and targets with read counts less than 200 across all samples were bioinformatically filtered (~11,800 targets) (*Middle*). The median of the geometric mean of the remaining 10,885 genes was then used for normalization (*Bottom*). At each step, datasets were analyzed by PCA to ensure that the clustering characteristics were maintained (*Left*). Meanwhile, violin plots were used to visualize the data shape and distribution (*Right*).

| Pearson pairwise correlation | coefficient |
|------------------------------|-------------|
| mir132_4 vs mir132_8         | 0.82        |
| mir132_4 vs mir132_12        | 0.76        |
| mir132_8 vs mir132_12        | 0.99        |
| mir124_3 vs mir124_7         | 0.82        |
| mir124_3 vs mir124_11        | 0.79        |
| mir124_7 vs mir124_11        | 1.00        |
| mir181_2 vs mir181_6         | 0.87        |
| mir181_2 vs mir181_10        | 0.87        |
| mir181_6 vs mir181_10        | 1.00        |

**Fig. S4.** Pearson pairwise correlation coefficients among replicates. The Pearson pairwise correlation coefficients among replicates averaged above 0.80, suggesting high reproducibility among biological replicates for the RISctrap assay.

miR-132 vs miR-124

miR-124 vs miR-181

miR-132 vs miR-181

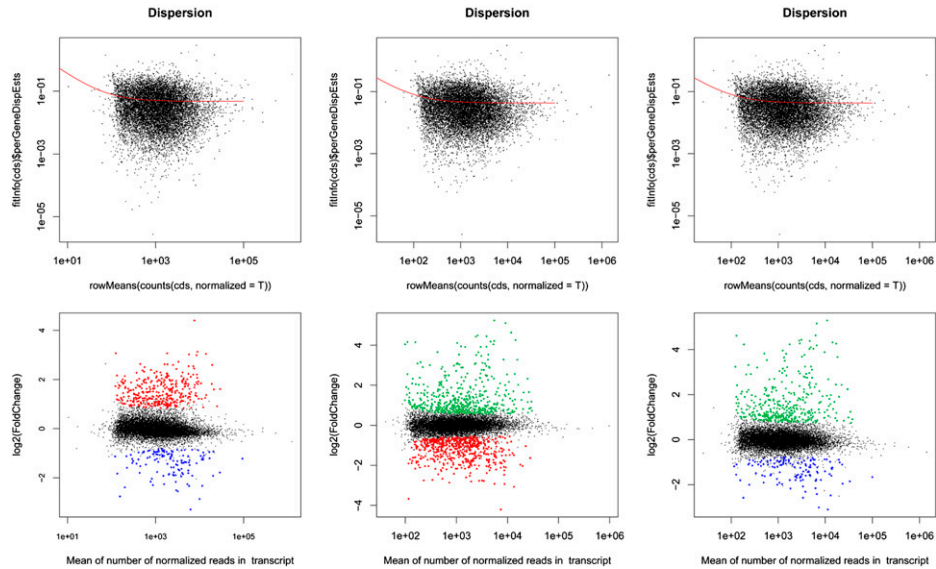

**Fig. 55.** Estimation of variance and differential enrichment for pairwise comparisons. The relationship between the data variance (dispersion) and mean is estimated in DESeq (1). Empirical dispersion values (black dots) were plotted against the normalized mean values per gene, with the fitted dispersion plotted as a red line (*Upper*). Differential enriched genes in pairwise comparisons were determined by ANOVA within the DESeq package, and significantly enriched genes were plotted as red, green, or blue dots in the corresponding graphs (*Lower*).

1. Anders S, Huber W (2010) Differential expression analysis for sequence count data. *Genome Biol* 11(10):R106.

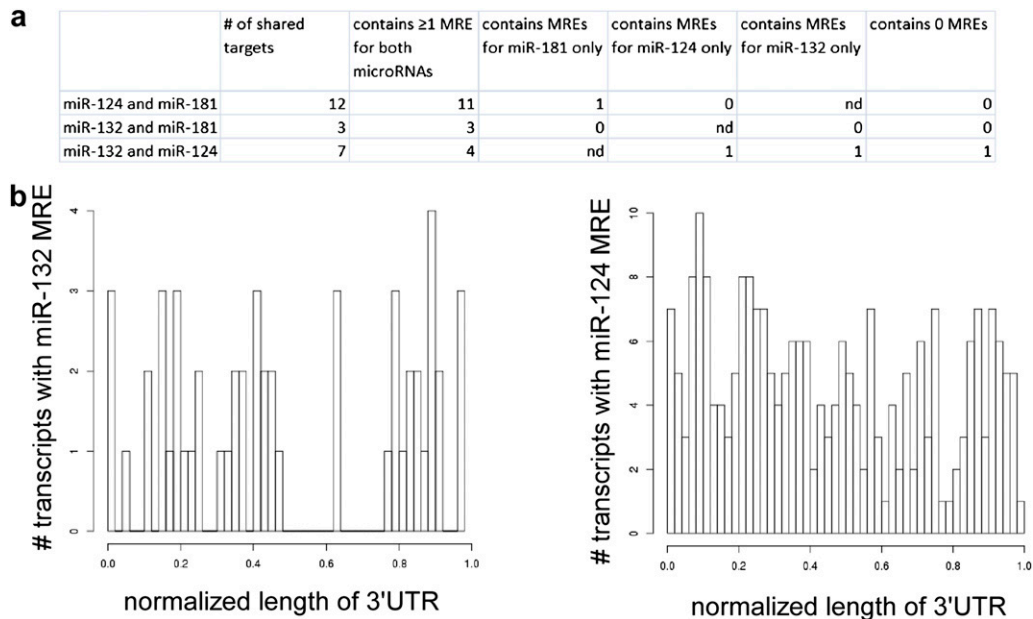

**Fig. 56.** Presence of MRE motifs among predicted coregulated targets and distribution along the length of normalized 3'UTRs. (A) Target sequences predicted to be coregulated by two distinct miRNAs were examined for inclusion of MRE motifs corresponding to both miRNAs. ND, not determined. (B) The frequency of MRE motifs is plotted against the relative position of MRE in the 3'UTR (miR-132, *Left*; miR-124, *Right*).

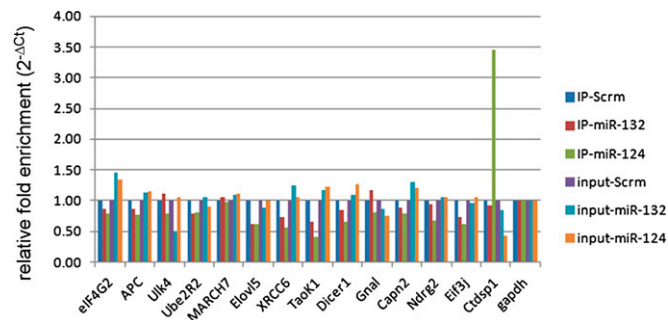

**Fig. S7.** Assessment of miR-124 targets not identified by RISCtrap for binding to RISC. Thirteen transcripts were selected for examination by qPCR for copurification with RISC containing a scrambled miRNA, miR-132, and miR-124 in the presence of Flag-dnGW182. Input RNA (100 ng) was also analyzed to confirm that the transcripts were expressed in HEK293T cells. qPCR primers for Ctdsp1 and Gapdh were included as positive and negative controls, respectively. Values were normalized to Gapdh.

## Other Supporting Information Files

[Dataset S1 \(XLSX\)](#)

[Dataset S2 \(XLSX\)](#)
